# Supplementary material
Source: PubMed Central journal article supplement (PMC2652262)
Supplement: M804801200_1.pdf [file M804801200_1.pdf]

**Table 1.** Fyn oligonucleotide sequences used for cloning of Fyn promoter and promoter fragments.

| Name                              | Sequence (5'-3')                         | Position       |
|-----------------------------------|------------------------------------------|----------------|
| For cloning of human Fyn promoter |                                          |                |
| FynPromo-F                        | <u>CAGATCTGAGAGCATATGACACTTAGTC</u>      | -2268 to -2247 |
| FynPromo-R                        | <u>GAAGCTTGCAATCAATTATTAAGTGATTACATC</u> | +858 to +883   |
| For the -2000/-1 construct        |                                          |                |
| FynPromo2000-F                    | <u>CAGATCTATGTTTTATTTAGCACAG</u>         | -2000 to -1982 |
| FynPromo1-R                       | <u>GAAGCTTGCCCCCTCCAGCTCCGGAG</u>        | -18 to -1      |
| For the -2000/-501 construct      |                                          |                |
| FynPromo2000-F                    | <u>CAGATCTATGTTTTATTTAGCACAG</u>         | -2000 to -1982 |
| FynPromo501-R                     | <u>GAAGCTTAAGAGTACGGAGCAAAGT</u>         | -518 to -501   |
| For the -1500/-1 construct        |                                          |                |
| FynPromo1500-F                    | <u>CAGATCTTCTGCTCTTGAGATAAGC</u>         | -1500 to -1482 |
| FynPromo1-R                       | <u>GAAGCTTGCCCCCTCCAGCTCCGGAG</u>        | -18 to -1      |
| For the -1500/-1 construct        |                                          |                |
| FynPromo1500-F                    | <u>CAGATCTTCTGCTCTTGAGATAAGC</u>         | -1500 to -1482 |
| FynPromo501-R                     | <u>GAAGCTTAAGAGTACGGAGCAAAGT</u>         | -518 to -501   |
| For the -1000/-1 construct        |                                          |                |
| FynPromo1000-F                    | <u>CAGATCTACTTTTCAGTAAACAGGAA</u>        | -1000 to -982  |
| FynPromo1-R                       | <u>GAAGCTTGCCCCCTCCAGCTCCGGAG</u>        | -18 to -1      |
| For the -1000/-501 construct      |                                          |                |
| FynPromo1000-F                    | <u>CAGATCTACTTTTCAGTAAACAGGAA</u>        | -1000 to -982  |
| FynPromo501-R                     | <u>GAAGCTTAAGAGTACGGAGCAAAGT</u>         | -518 to -501   |
| For the -500/-1                   |                                          |                |

|                               |                                     |              |
|-------------------------------|-------------------------------------|--------------|
| construct                     |                                     |              |
| FynPromo500-F                 | <u>CAGATCT</u> TTTCAGTTTGATCAAAGAA  | -500 to -483 |
| FynPromo1-R                   | <u>GAAGCTT</u> GCCCCCTCCAGCTCCGGAG  | -18 to -1    |
| For the -300/-1<br>construct  |                                     |              |
| FynPromo300-F                 | GAC <u>AGATCT</u> CTTTCTCCCGCCCT    | -300 to -284 |
| FynPromo1-R                   | <u>GAAGCTT</u> GCCCCCTCCAGCTCCGGAG  | -18 to -1    |
| For the -200/-1<br>construct  |                                     |              |
| FynPromo200-F                 | GAC <u>AGATCT</u> CCGCACGCACCCTGG   | -200 to -185 |
| FynPromo1-R                   | <u>GAAGCTT</u> GCCCCCTCCAGCTCCGGAG  | -18 to -1    |
| For the -200/-51<br>construct |                                     |              |
| FynPromo200-F                 | GAC <u>AGATCT</u> CCGCACGCACCCTGG   | -200 to -185 |
| FynPromo51-R                  | GAG <u>AAGCTT</u> AGTGACAGGCCCGG    | -55 to -51   |
| For the -150/-51<br>construct |                                     |              |
| FynPromo150-F                 | GAC <u>AGATCT</u> GCGGCCCCACCTACTGC | -150 to -133 |
| FynPromo1-R                   | <u>GAAGCTT</u> GCCCCCTCCAGCTCCGGAG  | -18 to -1    |
| For the -100/-1<br>construct  |                                     |              |
| FynPromo100-F                 | GAC <u>AGATCT</u> GGCTCGCAGCTCCCA   | -100 to -85  |
| FynPromo1-R                   | <u>GAAGCTT</u> GCCCCCTCCAGCTCCGGAG  | -18 to -1    |
| For the -50/-1 construct      |                                     |              |
| FynPromo50-F                  | GAC <u>AGATCT</u> CGAGGCGCGCCCCGCC  | -50 to -31   |
| FynPromo1-R                   | <u>GAAGCTT</u> GCCCCCTCCAGCTCCGGAG  | -18 to -1    |

**Table 2.** Oligonucleotide sequences used for mutagenesis of Egr1 and Sp1 binding sites.

| Mutagenesis of | Sequence (5'-3')                             | Position     |
|----------------|----------------------------------------------|--------------|
| Sp1 A-F        | GC <u>AGATCT</u> GCGG <u>TTT</u> CACCTACTGC  | -150 to -133 |
| Sp1 A-R        | <u>GAAGCTT</u> GCCCCCTCCAGCTCCGGAG           | -18 to -1    |
| Sp1 B-F        | GAC <u>AGATCT</u> CGAGGCGCG <u>TTT</u> CGCCC | -50 to -31   |
| Sp1 B-R        | <u>GAAGCTT</u> GCCCCCTCCAGCTCCGGAG           | -18 to -1    |

|            |                  |              |
|------------|------------------|--------------|
| Egr1 Del-F | AGGCGCCAATGGTTGC | -116 to -101 |
| Egr1 Del-R | GGACGGCAGTAGGTGG | -129 to -144 |

**Table 3.** Oligonucleotide sequences used for EMSA and CHIP assays.

| Oligonucleotide for EMSA | Sequence (5'-3')                | Position     |
|--------------------------|---------------------------------|--------------|
| Probe(-150/-121)-F       | GCGGCCCCACCTACTGCCGTCCC GCCCACG | -150 to -121 |
| Probe(-150/-121)-R       | CGTGGGCGGGACGGCAGTAGGTGGGGCCGC  | -150 to -121 |
| Probe(-140/-111)-F       | CTACTGCCGTCCC GCCCACGCCCCAGGCGC | -140 to -111 |
| Probe(-140/-111)-R       | GCGCCTGGGGCGTGGGCGGGACGGCAGTAG  | -140 to -111 |
| Probe(-50/-21)-F         | CTCGAGGCGCGCCCCGCCCTCCTCGCTC    | -50 to -21   |
| Probe(-50/-21)-R         | GAGCGAGGAGGGGGCGGGGCGCGCTCGAG   | -50 to -21   |
| Sp1-consensus-F          | ATTTCGATCGGGGCGGGGCGAGC         |              |
| Sp1-consensus-R          | GCTCGCCCCGCCCGATCGAAT           |              |
| Primers for CHIP         |                                 |              |
| ChIP-F                   | AAACACAAAGACCTCC                | -250 to -234 |
| ChIP-R                   | GCCCCCTCCAGCTCCGGAG             | -18 to -1    |
